# Supplementary material
Source: publisher site journal article supplement (https://www.dovepress.com/article/304395)
Supplement: Supplementary file 1 [file get_supplementary_file.php]

Supplementary Table 1 Direct costs of diabetes-related complications

| Complication/event | Cost, CAD | Reference |
| --- | --- | --- |
| Myocardial infarction, year of event | 20,341 | CADTH 2013[[1]](#endnote-1) |
| Myocardial infarction, subsequent years | 3,181 | CADTH 20131 |
| Angina, year of diagnosis | 4,386 | Brown et al. 2014[[2]](#endnote-2) |
| Angina, subsequent years | 2,046 | Brown et al. 20142 |
| Congestive heart failure, year of diagnosis | 19,485 | CADTH 20131 |
| Congestive heart failure, subsequent years | 5,463 | CADTH 20131 |
| Stroke, year of event | 27,707 | CADTH 20131 |
| Stroke, subsequent years | 3,844 | CADTH 20131 |
| Stroke death within 30 days | 10,668 | CADTH 20131 |
| Peripheral vascular disease | 6,600 | CADTH 20131 |
| Hemodialysis, annual cost | 84,038 | Brown et al. 20142 |
| Peritoneal dialysis, annual cost | 59,522 | Brown et al. 20142 |
| Renal transplant, year of event | 107,038 | Brown et al. 20142 |
| Severe hypoglycemic event | 2,173 | CADTH 20131 |
| Ketoacidosis event | 11,683 | Brown et al. 20142 |
| Lactoacidosis event | 11,683 | Brown et al. 20142 |
| Edema onset | 3,842 | Brown et al. 20142 |
| Laser eye treatment | 682 | Brown et al. 20142 |
| Cataract operation | 5,106 | Brown et al. 20142 |
| Cataract operation follow-up | 2,847 | CIHI[[3]](#endnote-3) |
| Blindness, year of onset | 3,403 | Brown et al. 20142 |
| Blindness, subsequent years | 2,426 | Brown et al. 20142 |
| Neuropathy, year of onset | 204 | Brown et al. 20142 |
| Amputation event | 10,598 | CIHI3 |
| Amputation prosthesis | 5,915 | Brown et al. 20142 |
| Gangrene treatment | 10,752 | Brown et al. 20142 |
| Infected ulcer | 3,008 | Brown et al. 20142 |
| Standard uninfected ulcer | 1,436 | Brown et al. 20142 |

CADTH, Canadian Agency for Drugs and Technologies in Health; CIHI, Canadian Institute for Health Information

All costs are presented in 2019 CAD

1. Canadian Agency for Drugs and Technologies in Health. Optimal use report 2013. Optimal use recommendations for second- and third-line therapy for people with type 2 diabetes. Available at: <https://www.cadth.ca/media/pdf/OP0512_Diabetes_RecsReport_2nd_3rd-line_e.pdf> [Last accessed April 24, 2020] [↑](#endnote-ref-1)
2. Brown ST, Grima DG, Sauriol L. Cost-effectiveness of insulin glargine versus sitagliptin in insulin-naïve patients with type 2 diabetes mellitus. Clin Ther. 2014 Nov 1;36(11):1576-8 [↑](#endnote-ref-2)
3. Canadian Institute for Health Information. Patient cost estimator. Available at: <https://www.cihi.ca/en/patient-cost-estimator> [Last accessed April 24, 2020] [↑](#endnote-ref-3)
